# Supplementary material for: Endovascular thrombectomy with or without intravenous alteplase for acute ischemic stroke due to large vessel occlusion: a systematic review and meta-analysis of randomized trials
Source: PubMed Central journal article supplement — Stroke Vasc Neurol. 2022 Jun 20;7(6):510–7. doi: 10.1136/svn-2022-001547 (PMC9811536; doi:10.1136/svn-2022-001547), 2022-06-20
Supplement: svn-2022-001547supp001.pdf [file svn-2022-001547supp001.pdf]

## Appendix 1: Summary of search strategy

### Database: OVID Medline Epub Ahead of Print, In-Process & Other Non-Indexed Citations, Ovid MEDLINE(R) Daily and Ovid MEDLINE(R) 1946 to Present

#### Search Strategy:

- 1 exp Stroke/ (151427)
- 2 (Cerebrovascular event or Stroke or apoplex or CVA or cerebrovascular accident or brain vascular accident or brain isch\* or brain infarc\* or cerebral infarc\$ or cerebral isch\$ or cerebral vessel occlusion or large vessel occlusion or intracranial isch\* or intracranial infarction or intracranial vessel occlusion or brain vessel occlusion).mp. [mp=title, abstract, original title, name of substance word, subject heading word, floating sub-heading word, keyword heading word, organism supplementary concept word, protocol supplementary concept word, rare disease supplementary concept word, unique identifier, synonyms] (390015)
- 3 1 or 2 (393519)
- 4 exp Thrombectomy/ (9289)
- 5 (Thrombectomy or thrombectomie\$ or mechanical or endovascular or embolectomy or intracranial intervention or Stent-retriever or stent retriever or preset or solitaire or trevo or catch).mp. [mp=title, abstract, original title, name of substance word, subject heading word, floating sub-heading word, keyword heading word, organism supplementary concept word, protocol supplementary concept word, rare disease supplementary concept word, unique identifier, synonyms] (532741)
- 6 4 or 5 (532741)
- 7 3 and 6 (22234)
- 8 exp Tissue Plasminogen Activator/ (19562)
- 9 ((plasminogen adj2 (activator or recombinant)) or (bridging\* or thrombolysis or rtPA or tpA or rt PA or alteplase or Tenecteplase or reteplase or Metalyse or tkase or tenecteplase or eokinase or rapilysin or retavase or actilyse or activase or alteplase or lysatec rt pa or lysatec rt-pa or lysatec rtpa or atleplase or cathflo activase or bridging-therapy)).mp. [mp=title, abstract, original title, name of substance word, subject heading word, floating sub-heading word, keyword heading word, organism supplementary

concept word, protocol supplementary concept word, rare disease supplementary concept word, unique identifier, synonyms] (130860)

10 8 or 9 (130860)

11 7 and 10 (5276)

12 (direct or combined or with or alone or combination or preceding or preinterventional or prior or before or previous or concomitant or stand-alone or together or following or followed or eligible or contraindication or ineligible or preproced\$ or preinterv\$ or prethrom\$ or pre-proced\$ or pre-inter\$ or pre-throm\$).mp. (20428682)

13 11 and 12 (4887)

14 randomized controlled trial.pt. (550704)

15 controlled clinical trial.pt. (94547)

16 randomized.ab. (541037)

17 placebo.ab. (223248)

18 drug therapy.fs. (2404278)

19 randomly.ab. (370115)

20 trial.ab. (576336)

21 groups.ab. (2273783)

22 or/14-21 (5179308)

23 exp animals/ not humans.sh. (4917301)

24 22 not 23 (4505655)

25 11 and 24 (2245)

26 random:.tw. or placebo:.mp. or double-blind:.tw. (1378661)

27 ((treatment or control) adj3 group\*).ab. (665358)

28 (allocat\* adj5 group\*).ab. (29061)

29 ((clinical or control\*) adj3 trial).ti,ab,kw. (324097)

30 or/26-29 (1918347)

31 30 not 23 (1654690)

32 11 and 31 (1138)

33 25 or 32 (2337)

34 limit 33 to ed=20210419-20211122 (232)

**Database: Embase <1974 to 2021 November 19>**

## Search Strategy:

- 1 exp cerebrovascular accident/ (247559)
- 2 (Cerebrovascular event or Stroke or apoplex or CVA or cerebrovascular accident or brain vascular accident or brain isch\* or brain infarc\* or cerebral infarc\$ or cerebral isch\$ or cerebral vessel occlusion or large vessel occlusion or intracranial isch\* or intracranial infarction or intracranial vessel occlusion or brain vessel occlusion).mp. (655054)
- 3 1 or 2 (655054)
- 4 exp thrombectomy/ (31288)
- 5 (Thrombectomy or thrombectomie\$ or mechanical or endovascular or embolectomy or intracranial intervention or Stent-retriever or stent retriever or preset or solitaire or trevo or catch).mp. (641195)
- 6 4 or 5 (643465)
- 7 3 and 6 (43522)
- 8 tissue plasminogen activator/ (30971)
- 9 (bridging\$ or thrombolysis or rtPA or tpA or rt PA or alteplase or bridging-therapy or plasminogen activator or recombinant-plasminogen or plasminogen-activator).mp. (183948)
- 10 8 or 9 (183948)
- 11 7 and 10 (11978)
- 12 (direct or combined or with or alone or combination or preceding or preinterventional or prior or before or previous or concomitant or stand-alone or together or following or followed or eligible or contraindication or ineligible or preproced\$ or preinterv\$ or prethrom\$ or pre-proced\$ or pre-inter\$ or pre-throm\$).mp. (25262604)
- 13 11 and 12 (11097)
- 14 limit 13 to yr="2017 -Current" (6400)
- 15 randomized controlled trial/ (683426)
- 16 Controlled clinical study/ (464339)
- 17 random\$.ti,ab. (1723999)
- 18 randomization/ (92125)

- 19 intermethod comparison/ (277105)
- 20 placebo.ti,ab. (332140)
- 21 (compare or compared or comparison).ti. (550422)
- 22 ((evaluated or evaluate or evaluating or assessed or assess) and (compare or compared or comparing or comparison)).ab. (2397242)
- 23 (open adj label).ti,ab. (92320)
- 24 ((double or single or doubly or singly) adj (blind or blinded or blindly)).ti,ab. (250276)
- 25 double blind procedure/ (189607)
- 26 parallel group\$1.ti,ab. (28397)
- 27 (crossover or cross over).ti,ab. (113472)
- 28 ((assign\$ or match or matched or allocation) adj5 (alternate or group\$1 or intervention\$1 or patient\$1 or subject\$1 or participant\$1)).ti,ab. (366751)
- 29 (assigned or allocated).ti,ab. (432042)
- 30 (controlled adj7 (study or design or trial)).ti,ab. (392334)
- 31 (volunteer or volunteers).ti,ab. (262212)
- 32 human experiment/ (558858)
- 33 trial.ti. (343162)
- 34 or/15-33 (5572251)
- 35 (random\$ adj sampl\$ adj7 ("cross section\$" or questionnaire\$1 or survey\$ or database\$1)).ti,ab. not (comparative study/ or controlled study/ or randomi?ed controlled.ti,ab. or randomly assigned.ti,ab.) (8759)
- 36 Cross-sectional study/ not (randomized controlled trial/ or controlled clinical study/ or controlled study/ or randomi?ed controlled.ti,ab. or control group\$1.ti,ab.) (288322)
- 37 (((case adj control\$) and random\$) not randomi?ed controlled).ti,ab. (19134)
- 38 (Systematic review not (trial or study)).ti. (191316)
- 39 (nonrandom\$ not random\$).ti,ab. (17382)
- 40 "Random field\$".ti,ab. (2603)
- 41 (random cluster adj3 sampl\$).ti,ab. (1392)
- 42 (review.ab. and review.pt.) not trial.ti. (940188)

43 "we searched".ab. and (review.ti. or review.pt.) (39021)  
 44 "update review".ab. (118)  
 45 (databases adj4 searched).ab. (46422)  
 46 (rat or rats or mouse or mice or swine or porcine or murine or sheep or lambs or  
 pigs or piglets or rabbit or rabbits or cat or cats or dog or dogs or cattle or bovine or  
 monkey or monkeys or trout or marmoset\$1).ti. and animal experiment/ (1128444)  
 47 Animal experiment/ not (human experiment/ or human/) (2368551)  
 48 or/35-47 (3826805)  
 49 34 not 48 (4942605)  
 50 11 and 49 (3566)  
 51 random:.tw. or placebo:.mp. or double-blind:.tw. (1988253)  
 52 ((treatment or control) adj3 group\*).ab. (963695)  
 53 (allocat\* adj5 group\*).ab. (37958)  
 54 ((clinical or control\*) adj3 trial).ti,ab,kw. (458102)  
 55 or/51-54 (2778117)  
 56 11 and 55 (2486)  
 57 56 not 48 (2136)  
 58 50 or 57 (3886)  
 59 limit 58 to dc=20210416-20211122 (466)

### Cochrane Library (Wiley)

Date Run: 22/11/2021

ID Search Hits

#1 MeSH descriptor: [Stroke] explode all trees 10731

#2 "Cerebrovascular event" or Stroke or apoplex or CVA or "cerebrovascular accident"  
 or "brain vascular accident" or "brain isch\*" or "brain infarc\*" or "cerebral infarc\$" or  
 "cerebral isch\$" or "cerebral vessel occlusion" or "large vessel occlusion" or "intracranial  
 isch\*" or "intracranial infarction" or "intracranial vessel occlusion" or "brain vessel  
 occlusion" 77142

#3 #1 or #2 77428

#4 MeSH descriptor: [Thrombectomy] explode all trees 327

- #5 Thrombectomy or thrombectomie\$ or mechanical or endovascular or embolectomy or "intracranial intervention" or Stent-retriever or stentretriever or preset or solitaire or trevo or catch 34519
- #6 #4 or #5 34519
- #7 #3 and #6 4017
- #8 MeSH descriptor: [Tissue Plasminogen Activator] explode all trees 1729
- #9 bridging\$ or thrombolysis or rtPA or tpA or rt PA or alteplase or bridging-therapy or "plasminogen activator" or recombinant-plasminogen or plasminogen-activator 12868
- #10 plasminogen near/2 (activator or recombinant) 4833
- #11 bridging\* or thrombolysis or rtPA or tpA or rt PA or alteplase or Tenecteplase or reteplase or Metalyse or tnkase or tenecteplase or eckinase or rapilysin or retavase or actilyse or activase or alteplase or lysatec rt pa or lysatec rt-pa or lysatec rtpa or atleplase or cathflo activase or bridging-therapy 10919
- #12 #9 or #10 or #11 13058
- #13 #7 and #12 in Trials 1029
- #14 #13 with Cochrane Library publication date Between Apr 2021 and Nov 2021 97

### Web of Science (Clarivate)

- 10 #8 and #9 194
- 9 LD=(2021-04-16/2021-11-22) 2,345,234
- 8 #7 AND #6 2,563
- 7 TS= clinical trial\* OR TS=controlled trial\* OR TS=random\* OR TS=placebo\* OR TS=(single blind\*) OR TS=(double blind\*) 2,812,250
- 6 #5 AND #2 AND #1 6,724
- 5 #4 OR #3 224,286
- 4 TS=(bridging\* or thrombolysis or rtPA or tpA or rt PA or alteplase or Tenecteplase or reteplase or Metalyse or tnkase or tenecteplase or eckinase or rapilysin or retavase or actilyse or activase or alteplase or lysatec rt pa or lysatec rt-pa or lysatec rtpa or atleplase or cathflo activase or bridging-therapy) 178,080
- 3 TS=(plasminogen NEAR/2 (activator or recombinant) ) 63,775

2 TS=(Thrombectomy OR thrombectomie\* OR mechanical OR endovascular OR embolectomy OR intracranial intervention OR Stent-retriever OR stent retriever OR preset OR solitaire OR trevo OR catch) 1,549,779

1 TS=(Cerebrovascular event OR Stroke OR apoplex OR CVA OR cerebrovascular accident OR brain vascular accident OR brain isch\* OR brain infarc\* OR cerebral infarc\* OR cerebral isch\* OR cerebral vessel occlusion OR large vessel occlusion OR intracranial isch\* OR intracranial infarction OR intracranial vessel occlusion OR brain vessel occlusion) 504,353

### **PubMed**

(((((publisher[sb] OR inprocess[sb] OR pubmednotmedline[sb] OR pubstatusaheadofprint)) AND (stroke or cerebrovascular accident)) AND (Thrombectomy)) AND ((bridging\* or thrombolysis or rtPA or tpA or rt PA or alteplase or Tenecteplase or reteplase or Metalyse or tkase or tenecteplase or eokinase or rapilysin or retavase or actilyse or activase or alteplase or lysatec rt pa or lysatec rt-pa or lysatec rtpa or atepase or cathflo activase or bridging-therapy) OR (Tissue Plasminogen Activator))) AND (((random\* or placebo or double-blind) OR (randomized clinical trial)) OR (controlled trial))

## Appendix 2: Characteristics of included studies

| Study                  |                    | DIRECT-MT <sup>1</sup>             | SKIP <sup>2</sup>                     | DEVT <sup>3</sup>                     | MR CLEAN-NO IV <sup>4</sup>                        | SWIFT DIRECT <sup>5</sup>                     | DIRECT SAFE <sup>6</sup>                        |
|------------------------|--------------------|------------------------------------|---------------------------------------|---------------------------------------|----------------------------------------------------|-----------------------------------------------|-------------------------------------------------|
| Study Period           |                    | February 23,2018 - July 2,2019     | January 1,2017 - July 31,2019         | May 20,2018 - May 2,2020              | January 2018 - October 2020                        | NA                                            | April, 2018 - June, 2021                        |
| Country                |                    | China                              | Japan                                 | China                                 | Europe                                             | North America and Europe                      | Australia, New Zealand, China and Vietnam       |
| N                      | EVT                | 327                                | 101                                   | 116                                   | 273                                                | 201                                           | 146                                             |
|                        | EVT with alteplase | 329                                | 103                                   | 118                                   | 266                                                | 207                                           | 147                                             |
| Age, median (IQR), y   | EVT                | 69(61-76)                          | 74(67-80)                             | 70(60-77)                             | 72(62-80)                                          | 73(64-81)                                     | 70 (61-78)                                      |
|                        | EVT with alteplase | 69(61-76)                          | 76(67-80)                             | 70(60-78)                             | 69(61-77)                                          | 72(65-81)                                     | 69 (60-79)                                      |
| Sex (Male%)            | EVT                | 189 (57.8)                         | 56(55)                                | 66(56.9)                              | 161(59)                                            | 96(48)                                        | 78 (53.4)                                       |
|                        | EVT with alteplase | 181 (55.0)                         | 72(70)                                | 66(55.9)                              | 144(54.1)                                          | 103(50)                                       | 88 (59.9)                                       |
| Alteplase Dose (mg/kg) |                    | 0.9                                | 0.6                                   | 0.9                                   | 0.9                                                | 0.9                                           | 0.9                                             |
| Inclusion criteria     | Occluded site      | ICA, MCA-M1 or M2 occlusion on CTA | ICA or MCA-M1 occlusion on CTA or MRA | ICA or MCA-M1 occlusion on CTA or MRA | ICA, MCA-M1 or proximal M2 occlusion on CTA or MRA | ICA or MCA-M1 occlusion or both on CTA or MRA | CTA or MRA of the ICA, M1, M2 or basilar artery |
|                        | mRS score          | mRS $\leq$ 2                       | mRS $\leq$ 2                          | mRS <2                                | mRS $\leq$ 2                                       | mRS $\leq$ 2                                  | mRS <4                                          |
|                        | NIHSS score        | $\geq$ 2                           | $\geq$ 6                              | No limit                              | $\geq$ 2                                           | $\geq$ 5 and <30                              | No limit                                        |



|                                                                |                           | ASPECTS                   | No limit   | DWI $\geq$ 5 or<br>CT $\geq$ 6 | No limit   | No limit   | $\geq$ 4                                                                                                                                                                                                                                                   | No limit                                                                   |
|----------------------------------------------------------------|---------------------------|---------------------------|------------|--------------------------------|------------|------------|------------------------------------------------------------------------------------------------------------------------------------------------------------------------------------------------------------------------------------------------------------|----------------------------------------------------------------------------|
| <b>Grading sICH</b>                                            |                           |                           | Heidelberg | SITS-MOST                      | Heidelberg | Heidelberg | Any parenchymal hematoma type 1, parenchymal hematoma type 2, remote intracranial hemorrhage, subarachnoid hemorrhage, or intraventricular hemorrhage associated with a $\geq$ 4 point worsening on the NIHSS at 24 hours $\pm$ 6 hours post randomization | ICH on CT scan, 24h window post stroke, NIHSS increase of 4 or more points |
| <b>Onset to randomization time, median (IQR), min</b>          | <b>EVT</b>                | 167(125-206)              | NA         | 170 (129-204)                  | 94(60-137) | NA         | NA                                                                                                                                                                                                                                                         |                                                                            |
|                                                                | <b>EVT with alteplase</b> | 177(126-215)              | NA         | 168 (144-216)                  | 93(71-152) | NA         | NA                                                                                                                                                                                                                                                         |                                                                            |
| <b>Randomization to groin puncture time, median (IQR), min</b> | <b>EVT</b>                | 31(20-45)                 | 20 (20)*   | NA                             | NA         | NA         | NA                                                                                                                                                                                                                                                         |                                                                            |
|                                                                | <b>EVT with alteplase</b> | 36(22-50.5)               | 22 (16)*   | NA                             | NA         | NA         | NA                                                                                                                                                                                                                                                         |                                                                            |
| <b>NIHSS score, median (IQR), min</b>                          | <b>EVT</b>                | 17(12-21)                 | 19(13-23)  | 16(12-20)                      | 16(10-20)  | 17(13-20)  | 15 (11-20)                                                                                                                                                                                                                                                 |                                                                            |
|                                                                | <b>EVT with alteplase</b> | 17(14-22)                 | 17(12-22)  | 16(13-20)                      | 16(10-20)  | 17(12-20)  | 15 (10-20)                                                                                                                                                                                                                                                 |                                                                            |
| <b>ASPECTS, median (IQR), min</b>                              | <b>EVT</b>                | 9(7-10)                   | 7(6-9)     | 8(7-9)                         | 9(8-10)    | 8(7-9)     | 10 (9-10)                                                                                                                                                                                                                                                  |                                                                            |
|                                                                | <b>EVT with alteplase</b> | 9(7-10)                   | 8(6-9)     | 8(7-9)                         | 9(8-10)    | 8(7-9)     | 10 (9-10)                                                                                                                                                                                                                                                  |                                                                            |
| <b>Comorbidities</b>                                           | <b>Hypertension</b>       | <b>EVT</b>                | 193/327    | 61/101                         | 69/116     | 121/273    | NA                                                                                                                                                                                                                                                         | NA                                                                         |
|                                                                |                           | <b>EVT with alteplase</b> | 201/329    | 61/103                         | 74/118     | 139/265    | NA                                                                                                                                                                                                                                                         | NA                                                                         |

|                                     |                                     |                           |                           |         |        |         |         |        |    |
|-------------------------------------|-------------------------------------|---------------------------|---------------------------|---------|--------|---------|---------|--------|----|
|                                     | <b>Diabetes mellitus</b>            | <b>EVT</b>                | 59/327                    | 16/101  | 25/116 | 40/273  | NA      | NA     |    |
|                                     |                                     | <b>EVT with alteplase</b> | 65/329                    | 17/103  | 20/118 | 50/266  | NA      | NA     |    |
|                                     | <b>Dyslipidemia</b>                 | <b>EVT</b>                | NA                        | 30/101  | 18/116 | NA      | NA      | NA     |    |
|                                     |                                     | <b>EVT with alteplase</b> | NA                        | 37/103  | 22/118 | NA      | NA      | NA     |    |
|                                     | <b>Atrial fibrillation</b>          | <b>EVT</b>                | 152/327                   | 57/101  | 62/116 | 86/273  | NA      | NA     |    |
|                                     |                                     | <b>EVT with alteplase</b> | 149/329                   | 64/103  | 62/118 | 63/266  | NA      | NA     |    |
|                                     | <b>Prior stroke</b>                 | <b>EVT</b>                | 43/327                    | 12/101  | 14/116 | 47/273  | NA      | NA     |    |
|                                     |                                     | <b>EVT with alteplase</b> | 47/329                    | 14/103  | 19/118 | 44/266  | NA      | NA     |    |
|                                     | <b>Prior cardiovascular disease</b> | <b>EVT</b>                | NA                        | 7/101   | 30/116 | NA      | NA      | NA     |    |
|                                     |                                     | <b>EVT with alteplase</b> | NA                        | 7/103   | 19/118 | NA      | NA      | NA     |    |
|                                     | <b>Smoking</b>                      | <b>EVT</b>                | NA                        | 42/101  | 28/116 | NA      | NA      | NA     |    |
|                                     |                                     | <b>EVT with alteplase</b> | NA                        | 54/103  | 29/118 | NA      | NA      | NA     |    |
|                                     | <b>Stroke mechanism</b>             | <b>Cardioembolic</b>      | <b>EVT</b>                | 146/327 | 67/101 | 65/116  | NA      | NA     | NA |
|                                     |                                     |                           | <b>EVT with alteplase</b> | 144/329 | 72/103 | 69/118  | NA      | NA     | NA |
| <b>Large artery atherosclerosis</b> |                                     | <b>EVT</b>                | NA                        | 21/101  | 32/116 | NA      | NA      | NA     |    |
|                                     |                                     | <b>EVT with alteplase</b> | NA                        | 15/103  | 28/118 | NA      | NA      | NA     |    |
| <b>Intracranial atherosclerosis</b> |                                     | <b>EVT</b>                | 26/327                    | NA      | 28/116 | NA      | NA      | NA     |    |
|                                     |                                     | <b>EVT with alteplase</b> | 19/329                    | NA      | 23/118 | NA      | NA      | NA     |    |
| <b>Unknown/other</b>                |                                     | <b>EVT</b>                | 155/327                   | 13/101  | 19/116 | NA      | NA      | NA     |    |
|                                     |                                     | <b>EVT with alteplase</b> | 166/329                   | 16/103  | 21/118 | NA      | NA      | NA     |    |
| <b>Clot location</b>                | <b>ICA</b>                          | <b>EVT</b>                | 112/320                   | 36/101  | 18/116 | 68/273  | 58/201  | 33/146 |    |
|                                     |                                     | <b>EVT with alteplase</b> | 114/326                   | 36/103  | 17/118 | 50/266  | 59/207  | 31/147 |    |
|                                     | <b>M1</b>                           | <b>EVT</b>                | 161/320                   | 54/101  | 95/116 | 156/272 | 142/201 | 80/146 |    |
|                                     |                                     | <b>EVT with alteplase</b> | 178/326                   | 47/103  | 99/118 | 174/266 | 148/207 | 83/147 |    |
|                                     | <b>M2</b>                           | <b>EVT</b>                | 42/320                    | 10/101  | 3/116  | 45/272  | 1/201   | 21/146 |    |
|                                     |                                     | <b>EVT with alteplase</b> | 33/326                    | 20/103  | 2/118  | 40/266  | 0/207   | 23/147 |    |
|                                     | <b>Tandem occlusion</b>             | <b>EVT</b>                | NA                        | 9/101   | NA     | 48/257  | 30/201  | 27/146 |    |
|                                     |                                     | <b>EVT with alteplase</b> | NA                        | 13/103  | NA     | 40/250  | 33/207  | 20/147 |    |

EVT = endovascular thrombectomy, ICA = internal carotid artery, MCA = middle cerebral artery, MRA = magnetic resonance angiography, CTA = computed tomographic angiography, mRS = modified Rankin Scale, NIHSS = National Institutes of Health Stroke Scale, ASPECTS = Alberta Stroke Program Early Computed Tomography Score, sICH = symptomatic intracranial hemorrhage, SITS-MOST = Safe Implementation of Thrombolysis in Stroke-Monitoring Study, NA = not available.

\* mean (SD)

**Appendix 3: Risk of bias assessment**

| Study                       | Sequence Generation | Allocation Sequence Concealment | Blinding |                      |                 |                   |               | Missing Outcome Data | Free of selective outcome reporting |
|-----------------------------|---------------------|---------------------------------|----------|----------------------|-----------------|-------------------|---------------|----------------------|-------------------------------------|
|                             |                     |                                 | Patients | Healthcare providers | Data collectors | Outcome assessors | data analysts |                      |                                     |
| DIRECT-MT <sup>1</sup>      | Low                 | Low                             | High     | High                 | High            | Low               | High          | Low                  | Low                                 |
| SKIP <sup>2</sup>           | Low                 | Low                             | High     | High                 | High            | Low               | High          | Low                  | Low                                 |
| DEVT <sup>3</sup>           | Low                 | Low                             | High     | High                 | High            | Low               | High          | Low                  | Low                                 |
| MR CLEAN-NO IV <sup>4</sup> | Low                 | Low                             | High     | High                 | High            | Low               | High          | Low                  | Low                                 |
| SWIFT DIRECT <sup>5</sup>   | Low                 | Low                             | High     | High                 | High            | Low               | High          | Low                  | Low                                 |
| DIRECT SAFE <sup>6</sup>    | Low                 | Low                             | High     | High                 | High            | Low               | High          | Low                  | Low                                 |

**Appendix 4: Sensitivity analysis by excluding SKIP trial**

| <b>Outcomes</b>                                          | <b>Relative effects (95% CI)</b> |                                                     |
|----------------------------------------------------------|----------------------------------|-----------------------------------------------------|
|                                                          | <b>Results from 6 RCTs</b>       | <b>Sensitivity analysis by excluding SKIP trial</b> |
| Minimal disability measured by modified Rankin Score 0-2 | RR 0.97 (0.89-1.05)              | RR 0.96 (0.88-1.04)                                 |
| Mortality                                                | RR 1.07 (0.88-1.29)              | RR 1.07 (0.89-1.30)                                 |
| Symptomatic intracranial hemorrhage                      | RR 0.75 (0.52-1.07)              | RR 0.75 (0.51-1.09)                                 |

## Appendix 5: Forest plots of procedure-related complications

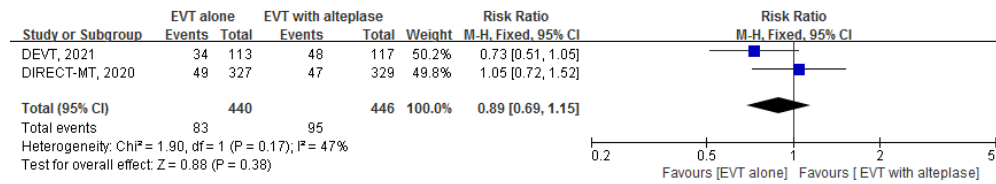

Forest plot for endovascular thrombectomy (EVT) alone versus EVT with intravenous alteplase for procedure-related complications

## **Appendix 6: The definition of procedure-related complications and symptomatic hemorrhage**

### **The definition of procedure-related complications**

DIRECT-MT: Vessel dissection, contrast extravasation, embolization into a new territory and femoral access complications

DEVT: Clot migration, distal occlusion present at procedure end, contrast extravasation, arterial perforation and puncture access complications

### **The definition of symptomatic hemorrhage**

Heidelberg<sup>7</sup>: Symptomatic intracerebral hemorrhage detected by brain imaging as a relevant change in neurological status; absence of another explanation for deterioration; an event leading to intubation, hemicraniectomy, or external ventricular draining placement; or other major medical or surgical intervention.

Safe Implementation of Thrombolysis in Stroke–Monitoring Study (SITS-MOST)<sup>8</sup>: Local or remote parenchymal hematoma type 2 on the imaging scan obtained 22 to 36 hours after treatment, plus neurological deterioration.

National Institute of Neurological Disorders and Stroke (NINDS)<sup>9</sup>: Symptomatic if hemorrhage had not been seen on a previous computed tomographic (CT) scan but either subsequent suspicion of hemorrhage or decline in neurological status existed.

## References

1. Yang P, Zhang Y, Zhang L, et al. Endovascular Thrombectomy with or without Intravenous Alteplase in Acute Stroke. *The New England journal of medicine*. 2020;382(21):1981-1993.
2. Suzuki K, Matsumaru Y, Takeuchi M, et al. Effect of Mechanical Thrombectomy Without vs With Intravenous Thrombolysis on Functional Outcome Among Patients With Acute Ischemic Stroke: The SKIP Randomized Clinical Trial. *Jama*. 2021;325(3):244-253.
3. Zi W, Qiu Z, Li F, et al. Effect of Endovascular Treatment Alone vs Intravenous Alteplase Plus Endovascular Treatment on Functional Independence in Patients With Acute Ischemic Stroke: The DEVT Randomized Clinical Trial. *Jama*. 2021;325(3):234-243.
4. LeCouffe NE, Kappelhof M, Treurniet KM, et al. A Randomized Trial of Intravenous Alteplase before Endovascular Treatment for Stroke. *The New England journal of medicine*. 2021;385(20):1833-1844.
5. Fischer U. Solitaire™ With the Intention For Thrombectomy Plus Intravenous t-PA Versus DIRECT Solitaire™ Stent-retriever Thrombectomy in Acute Anterior Circulation Stroke. *European Stroke Conference*. 2021.
6. Mitchell P. DIRECT SAFE: A randomized controlled trial of DIRECT endovascular clot retrieval versus standard bridging thrombolysis with endovascular clot retrieval within 4.5 hours of stroke onset. *World Stroke Congress*. 2021.
7. von Kummer R, Broderick JP, Campbell BC, et al. The Heidelberg bleeding classification: classification of bleeding events after ischemic stroke and reperfusion therapy. *Stroke* 2015;46:2981-6.
8. Wahlgren N, Ahmed N, Eriksson N, et al. Multivariable analysis of outcome predictors and adjustment of main outcome results to baseline data profile in randomized controlled trials: Safe Implementation of Thrombolysis in Stroke-MONitoring Study (SITS-MOST). *Stroke; a journal of cerebral circulation*. 2008-Dec 2008;39(12):3316-22.
9. National Institute of Neurological D, Stroke rt PAS, Study G. Tissue plasminogen activator for acute ischemic stroke. *The New England journal of medicine*. 1995-12-14 1995;333(24):1581-7.
